# Supplementary material for: Impact of Social Frailty in Hospitalized Elderly Patients With Heart Failure: A FRAGILE‐HF Registry Subanalysis
Source: PubMed Central journal article supplement — J Am Heart Assoc. 2021 Sep 2;10(17):e019954. doi: 10.1161/JAHA.120.019954 (PMC8649263; doi:10.1161/jaha.120.019954), 2021-09-02
Supplement: JAH3-10-e019954-s001.pdf [file JAH3-10-e019954-s001.pdf]

# **Supplemental Material**

**Table S1. Makizako's 5 questions used to assess social frailty and the number of patients (%) who provided positive answers.**

| <b>Questions</b>                                        | <b>Number of patients giving positive answer (%)</b> |
|---------------------------------------------------------|------------------------------------------------------|
| Going out less frequently compared with last year (yes) | 809 (65.2)                                           |
| Sometimes visiting friends (no)                         | 829 (66.9)                                           |
| Talking with someone every day (no)                     | 243 (19.6)                                           |
| Feeling helpful toward friends or family (no)           | 811 (65.4)                                           |
| Living alone (yes)                                      | 313 (25.2)                                           |

**Table S2. Distribution of the number of positive answers given to Makizako's 5 questions.**

---

| <b>Score*</b> | <b>Number of patients (%)</b> |
|---------------|-------------------------------|
| 0             | 119 (9.6)                     |
| 1             | 296 (23.9)                    |
| 2             | 378 (30.5)                    |
| 3             | 270 (21.8)                    |
| 4             | 124 (10.0)                    |
| 5             | 53 (4.2)                      |

---

\* The number of positive answers given. Patients who responded positively to 2 or more questions were defined as having social frailty.
